# Supplementary material for: Using MetaboAnalyst 5.0 for LC–HRMS spectra processing, multi-omics integration and covariate adjustment of global metabolomics data
Source: Springer Nature journal article supplement (doi:10.1038/s41596-022-00710-w), 2022-06-17
Supplement: MOESM1 [file 41596_2022_710_MOESM1_ESM22.pdf]

---

## Supplementary information

---

# Using MetaboAnalyst 5.0 for LC–HRMS spectra processing, multi-omics integration and covariate adjustment of global metabolomics data

---

In the format provided by the  
authors and unedited

## **Supplementary Materials**

### **Using MetaboAnalyst 5.0 for LC-HRMS spectra processing, multi-omics integration and covariate adjustment of global metabolomics data**

<sup>1</sup>Zhiqiang Pang, <sup>1</sup>Guangyan Zhou, <sup>2</sup>Jessica Ewald, <sup>3</sup>Le Chang, <sup>1</sup>Orcun Hacariz, <sup>2</sup>Niladri Basu,

<sup>1,3\*</sup>Jianguo Xia

<sup>1</sup>Institute of Parasitology, McGill University, Montreal, Quebec, Canada

<sup>2</sup>Department of Natural Resources Sciences, McGill University, Montreal, Quebec, Canada

<sup>3</sup>Department of Human Genetics, McGill University, Montreal, Quebec, Canada

\*Correspondence:

Tel: 1-514-398-8668

Email: [jeff.xia@mcgill.ca](mailto:jeff.xia@mcgill.ca)

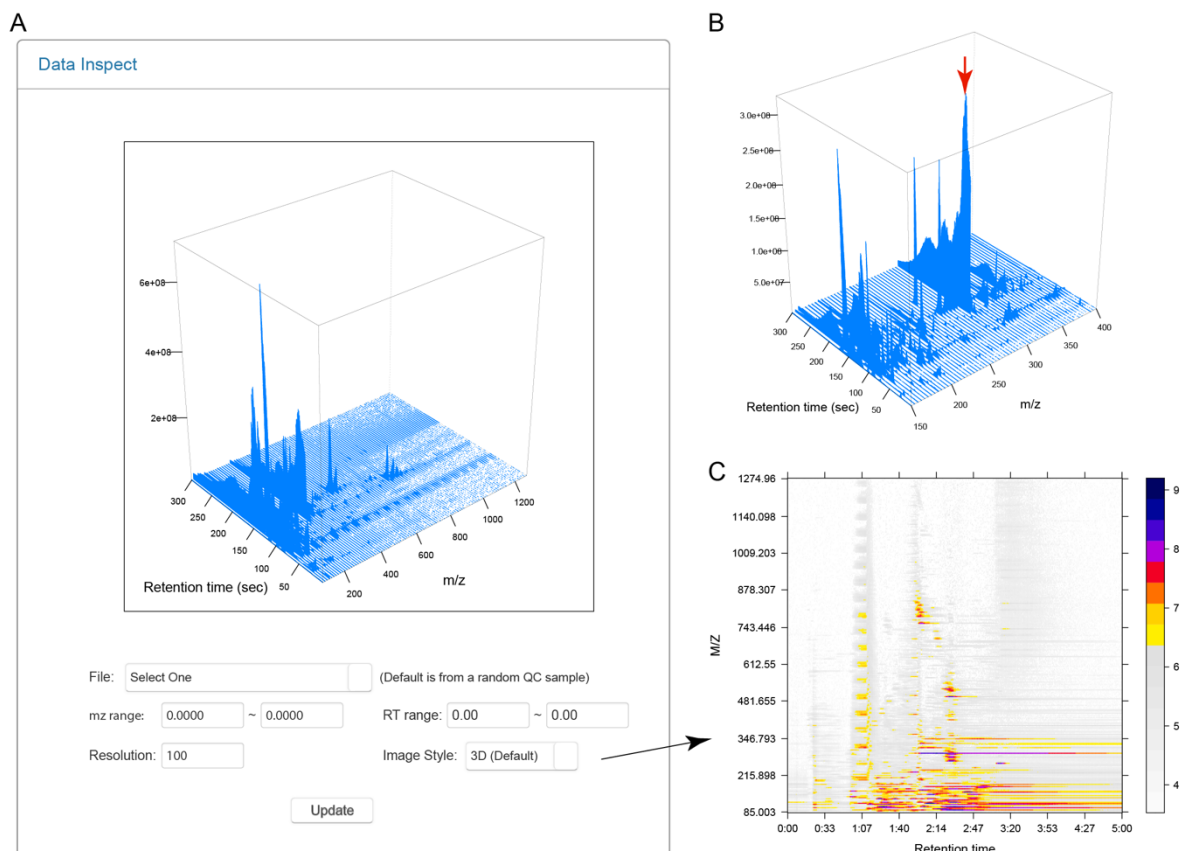

**Figure S1 | Global raw spectra inspection.** (A) A screenshot of ‘Spectral Inspection’ dialog. User could view the global spectra of sample ‘QC\_001.mzML’ in a 3D view. Different files and view range from RT and m/z dimension can be easily updated. The default resolution is 100, which can be higher to over 1,000 to view every single detail. (B) A zoom-in view of m/z range (150~400). There is at least one potential contaminants peak (marked by the red arrow), which is quite intensive and persists over half of the entire chromatogram. Therefore, it is recommended to enable the ‘Contaminants Removal’ option. (C) An example of the data in 2D heatmap view.

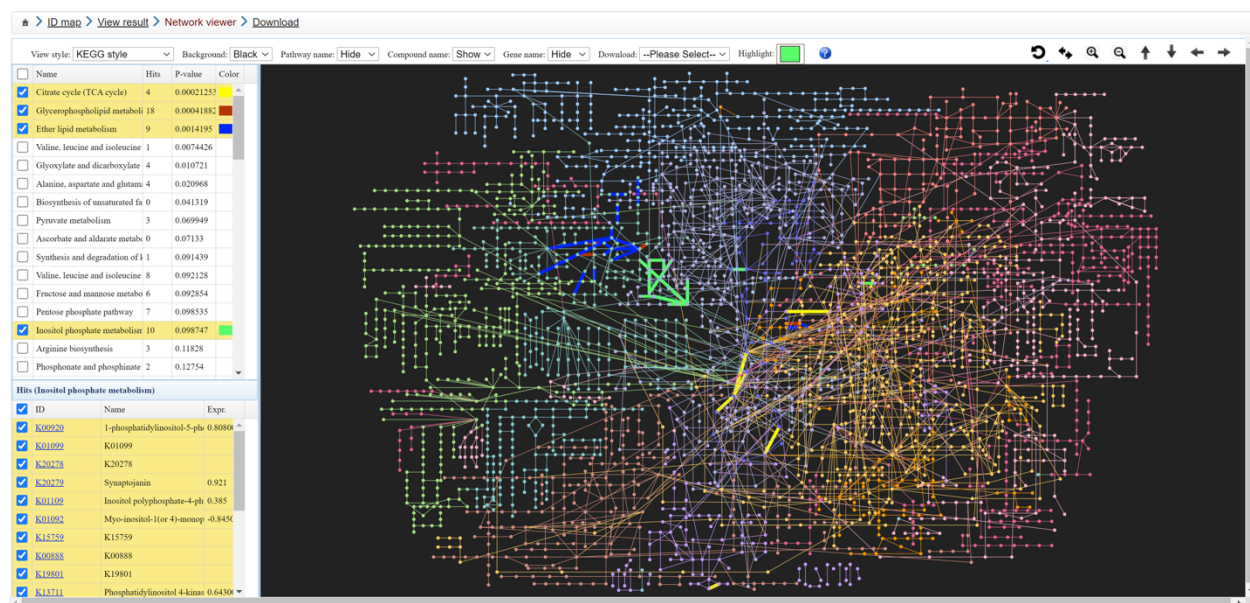

**Figure S2 | Network view of the integrated pathways.** There are four pathways have been highlighted in the network. The details of the pathways are displayed from the right side.

**Table S1.** Key parameters for peak picking, alignment and annotation

| Steps           | Parameters  | Explanations and guidance                                                                                                                                                  |
|-----------------|-------------|----------------------------------------------------------------------------------------------------------------------------------------------------------------------------|
| Peak Picking    | Peak Width  | Peak width values in second, include minimum value and maximum value.                                                                                                      |
|                 | ppm         | Tolerated mass deviation in one part per million (ppm). Empirically, a value between 2~5 is recommended for orbitrap, but 15~30 is commonly used for Time-of-Flight (TOF). |
|                 | mzdiff      | Minimum m/z value for peaks with overlapping retention time                                                                                                                |
|                 | snthresh    | Signal-to-noise threshold, default is 10.                                                                                                                                  |
|                 | noise       | Noise level for filtration, default is 1,000. The higher of the value, the less features will be detected.                                                                 |
|                 | prefilter   | Scan filter to discard peaks less than minimum scan number (prefilter) or abundance (value_of_prefilter).                                                                  |
|                 | fwhm        | Full-width at half-maximum, default is 30. This parameter is only used for Matched Filter algorithm.                                                                       |
| Peak Alignment  | Method      | Algorithms to perform retention time correction, including LOESS and Obiwrap.                                                                                              |
|                 | Bandwidth   | Bandwidth of Gaussian smooth kernel. For Q-exactive orbitrap, the recommended value is 2~5, while for TOF, 5~15 is preferred.                                              |
|                 | MinFraction | Minimum fraction of samples to be grouped. A value larger than 0.5 is recommended to ensure the quality of features.                                                       |
|                 | minSamples  | Minimum number of samples for grouping as a peak to present. Default is 1.                                                                                                 |
|                 | maxFeatures | maximum number of peaks to be defined in one m/z slice for peak grouping. Default is 100.                                                                                  |
| Peak Annotation | Polarity    | To specify the ion mode of mass spectrometer when doing the acquisition. 'Positive' and 'Negative' are provided for selection                                              |
|                 | Adducts     | Potential adducts are highly related with chromatographic conditions. User could manually define the adducts' annotation rule or use the standard option by default.       |
|                 | Perc_fwhm   | Percentage of 'fwhm'. This parameter defines the boundaries to group features as one group for annotation.                                                                 |
|                 | Mz_abs_iso  | Allowed variance of mass for isotopes searching.                                                                                                                           |
|                 | Max_charge  | Maximum charge of isotopes                                                                                                                                                 |
|                 | Max_iso     | Maximum number of isotopes.                                                                                                                                                |
|                 | Corr_eic_th | Correlation threshold value for EIC correlation.                                                                                                                           |
|                 | Mz_abs_add  | Allowed variance of mass for adducts searching.                                                                                                                            |
